# Supplementary material for: Highly intense NIR emissive Cu4Pt2 bimetallic clusters featuring Pt(i)–Cu4–Pt(i) sandwich kernel
Source: Royal Society of Chemistry journal article supplement (doi:10.1039/d4sc01022a), 2024-01-01
Supplement: d4sc01022a1.pdf [file d4sc01022a1.pdf]

## Supporting Information

### **Highly intense NIR emissive Cu<sub>4</sub>Pt<sub>2</sub> bimetallic clusters featuring Pt(I)-Cu<sub>4</sub>-Pt(I) sandwich kernel**

*Rui-Ru Zhong,<sup>+</sup> Mo Xie,<sup>+</sup> Cui-Zhou Luan, Lin-Mei Zhang, De-Bo Hao, Shang-Fu Yuan,<sup>\*</sup> and Tao Wu<sup>\*</sup>*

College of Chemistry and Materials Science, and Guangdong Provincial Key Laboratory of Functional Supramolecular Coordination Materials and Applications, Jinan University, Guangzhou 510632, P. R. China.

E-mail: sfyuan@jnu.edu.cn; wutao@jnu.edu.cn.

<sup>+</sup>These authors contributed equally to this work.

## I. Experimental Section

### Chemicals and Materials

Tetrakis(acetonitrile)copper(I) hexafluorophosphate ( $\text{Cu}(\text{CH}_3\text{CN})_4\text{PF}_6$ , 98%), potassium tetrachloroplatinate(II) ( $\text{K}_2\text{PtCl}_4$ , 98%), 4-(trifluoromethyl) phenylacetylene ( $\text{CF}_3\text{-PhC}\equiv\text{CH}$ , 97%), 4-biphenylacetylene ( $\text{BiPh-C}\equiv\text{CH}$ , 97%), 2-ethynyl-naphthalene ( $\text{Nap-C}\equiv\text{CH}$ , 98%), 4-fluorophenylacetylene ( $\text{F-PhC}\equiv\text{CH}$ , 98%) were purchased from Bidepharm. Platinum(II) acetylacetonate ( $\text{Pt}(\text{acac})_2$ , 97%) was purchased from Meryer; diphenyl-2-pyridylphosphine (dppy, 97%), 4-methoxyphenylacetylene ( $\text{MeO-PhC}\equiv\text{CH}$ , 98%) were purchased from Macklin; sodium hydroborate ( $\text{NaBH}_4$ , AR) and other reagents employed were purchased from GHTECH. All reagents were used as received.  $[\text{Cu}_8\text{H}_6(\text{dppy})_6](\text{PF}_6)_2$  was prepared according to the reported method.<sup>1</sup>

## II. Physical measurements

$^1\text{H}$  and  $^{31}\text{P}$  NMR spectra were recorded on a Bruker Biospin Avance instrument (400 MHz). Fourier transform infrared (FT-IR) spectra were collected on Thermo Scientific FT-IR Nicolet iS10 spectrophotometer. Powder X-ray diffraction (PXRD) patterns were recorded on Rigaku Ultima IV X-ray Diffractometer ( $\text{Cu K}\alpha$ ,  $\lambda = 1.5418 \text{ \AA}$ ) in a step of  $0.02^\circ$  at 40 kV and 40 mA. X-ray photoelectron (XPS) spectroscopy spectra were performed by a Thermo ESCALAB 250XI system. Electron Paramagnetic Resonance (EPR) analysis was carried out on Bruker Magnettech ESR5000 in ESI, Bruker A300 in article. The solid-state UV-Vis-NIR diffuse reflection spectra and solution-state UV-vis spectra were recorded by with Agilent Cary 4000 UV-vis spectrophotometer. The PL and PLE spectra at room temperature were performed on an FLS1000 fluorescence spectrophotometer (Edinburgh Instruments Ltd., U. K.) equipped with a continuous xenon lamp (450 W) as an excitation source and a liquid-nitrogen cooled NIR photomultiplier tube as the detector (Hamamatsu, R5509, InP/InGaAsP). The PL decay curve was also measured by FLS1000 instrument using a microsecond flash lamp ( $\mu\text{F900}$ ) as the excitation source with data collection for 5000

counts. The quantum efficiency at room temperature was measured by an absolute PL quantum yield spectrometer (Quantaury-QY Plus C13534-12, Hamamatsu Photonics). **X-ray Crystallography.** Intensity data of five **Cu<sub>4</sub>Pt<sub>2</sub>** clusters were collected on an Oxford Cryo stream system on a XtaLAB PRO MM007-DW diffractometer system equipped with HyPix-6000HE Hybrid Photon Counting (HPC) X-ray detector (Rigaku, Japan, Cu K $\alpha$ , graphite monochromator,  $\lambda = 1.54 \text{ \AA}$ ). Absorption corrections were applied by using the program CrysAlis (multi-scan). The structures were solved by direct methods, and non-hydrogen atoms were refined anisotropically by least-squares on  $F^2$  using the SHELXTL program.

### III. Computational details

All calculations were performed by using density functional theory (DFT) and time-dependent density functional theory (TDDFT) within Gaussian09 suite of program<sup>2</sup>. The hybrid functional B3LYP<sup>3</sup> with dispersion correction<sup>4</sup> (B3LYP-D3) and effective core potential and the corresponding basis set SDD<sup>5</sup> was applied for Cu and Pt atoms, double zeta basis set 6-31G(d)<sup>6</sup> was applied for other atoms. The geometries of **MeO-Cu<sub>4</sub>Pt<sub>2</sub>** in ground state were fully optimized based on the X-ray crystal structures. The singlet vertical excitation energy and corresponding electron transitions as well as the frontier molecular orbital analysis was based on the ground state geometry. Based on the excitation energy,  $E_{n \rightarrow m}$ , and oscillator strength  $f$ , the absorption spectra were simulated using Gaussian functions. A full-width at half-maximum (FWHM), that is, the broadening of each peak (individual transition) of 0.30 eV was applied. The geometries of five deprotonated ligands were fully optimized as well. The corresponding electronic structure analysis were accomplished by Multiwfn 3.8<sup>7</sup> and the visualization of the frontier molecular orbitals were done by Gaussview 6 and VMD 1.9.3<sup>8</sup>.

#### IV. Supporting figures

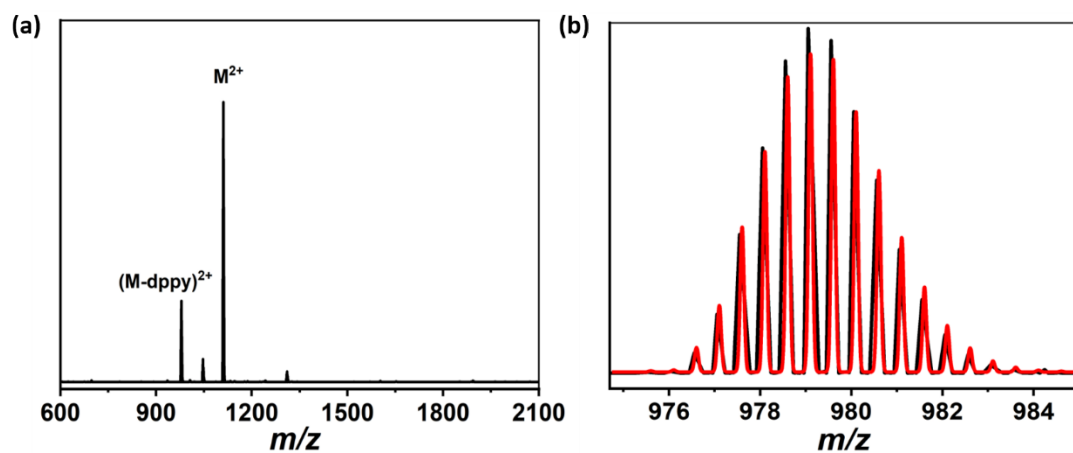

**Figure S1.** (a) ESI-MS spectra of **MeO-Cu<sub>4</sub>Pt<sub>2</sub>**. (b) Experimental (black trace) and simulated (red trace) isotopic patterns of  $[Cu_4Pt_2(MeO-C_6H_5-C\equiv C)_4(dppy)_3]^{2+}$  (calcd.  $m/z$  970.38), which is a fragment ion of **MeO-Cu<sub>4</sub>Pt<sub>2</sub>** after losing one dppy ligand.

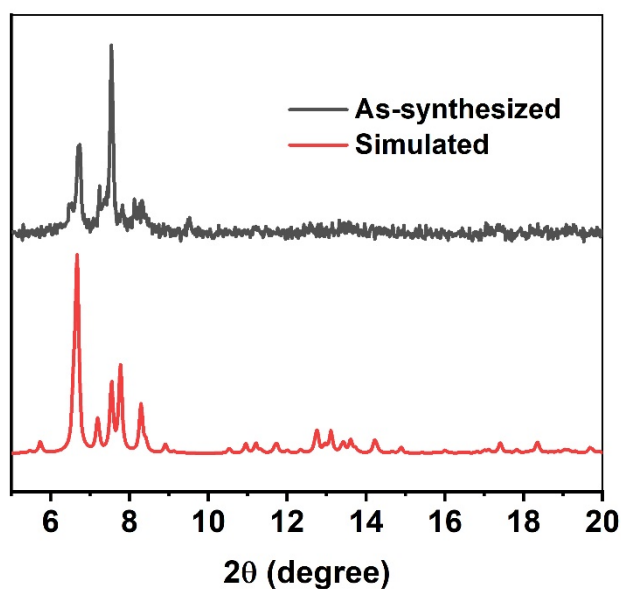

**Figure S2.** The comparison of simulated and as-synthesized PXRD patterns of **MeO-Cu<sub>4</sub>Pt<sub>2</sub>**.

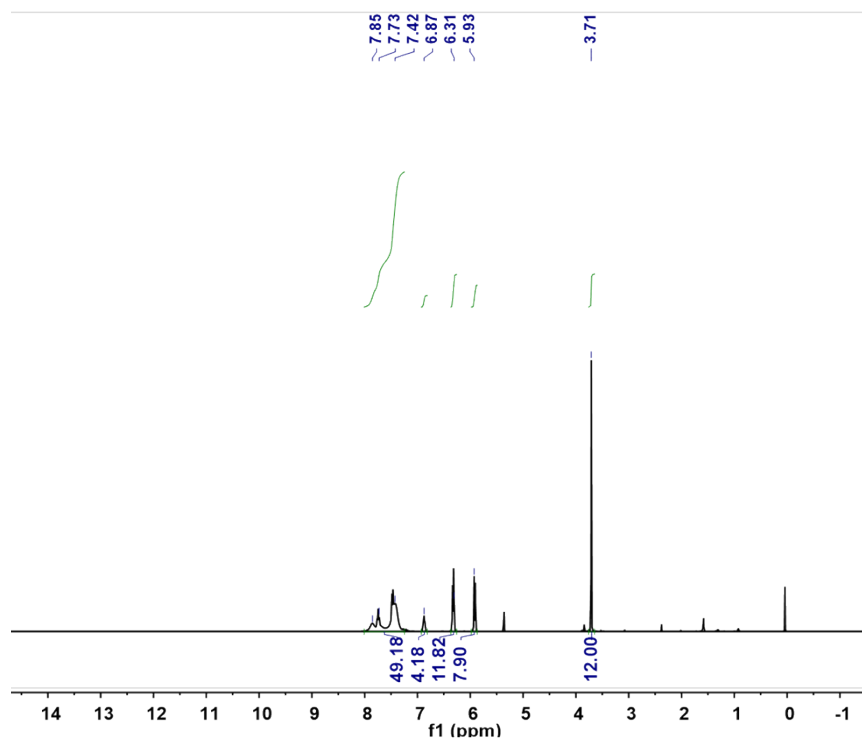

Figure S3.  $^1\text{H}$  NMR spectrum of the  $\text{MeO-Cu}_4\text{Pt}_2$ .

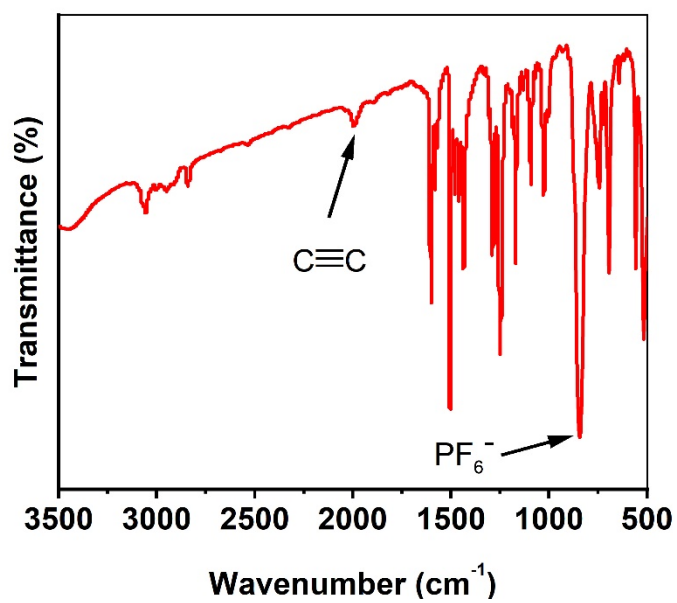

Figure S4 FT-IR spectra of  $\text{MeO-Cu}_4\text{Pt}_2$ .

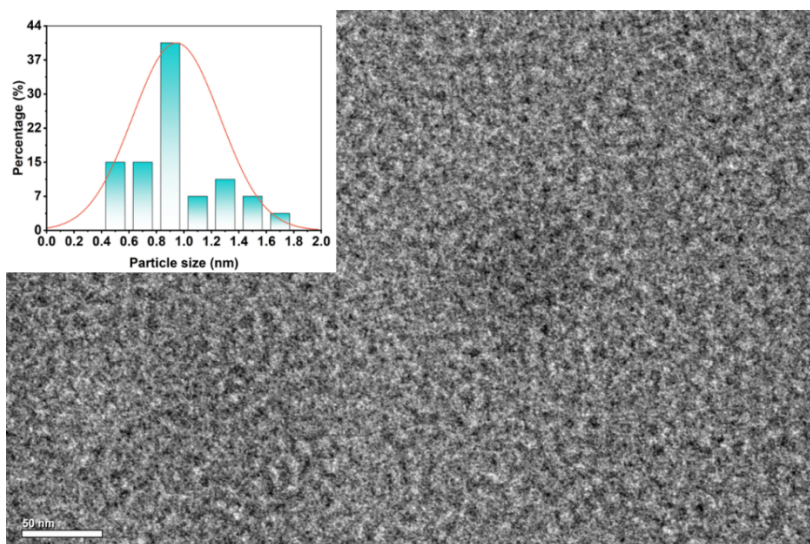

**Figure S5.** TEM image of MeO-Cu<sub>4</sub>Pt<sub>2</sub> in acetone.

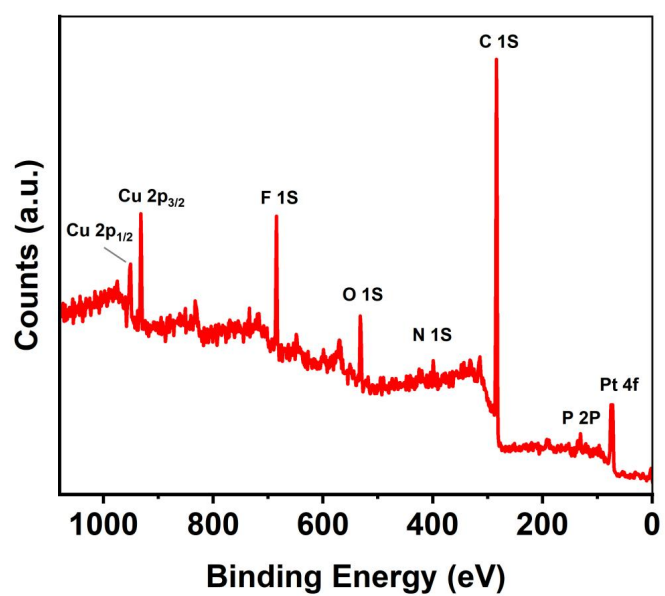

**Figure S6.** XPS full spectrum of MeO-Cu<sub>4</sub>Pt<sub>2</sub>.

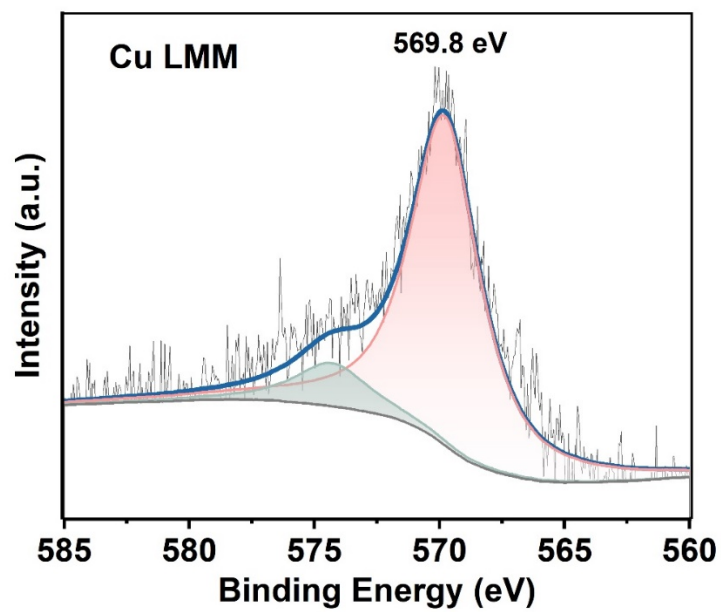

Figure S7. Cu LMM spectrum of MeO-Cu<sub>4</sub>Pt<sub>2</sub>.

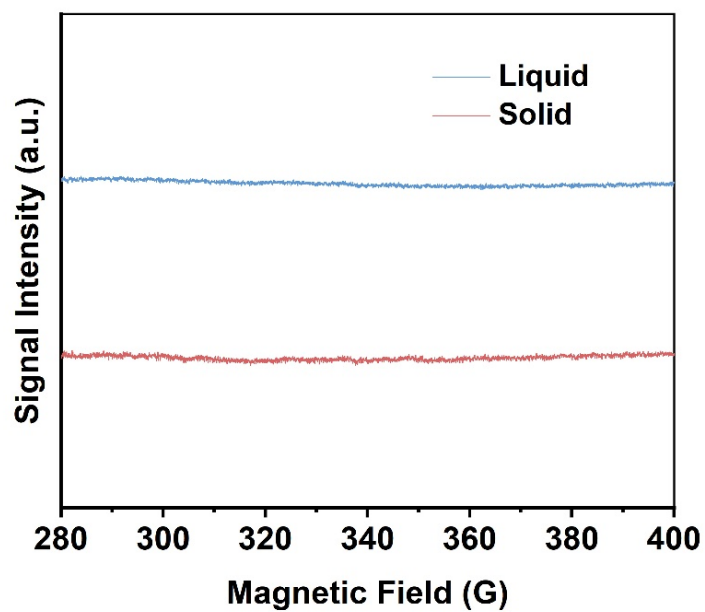

Figure S8. EPR spectra of MeO-Cu<sub>4</sub>Pt<sub>2</sub> in crystal state and in CH<sub>2</sub>Cl<sub>2</sub> solution (2 mg/mL) under ambient conditions.

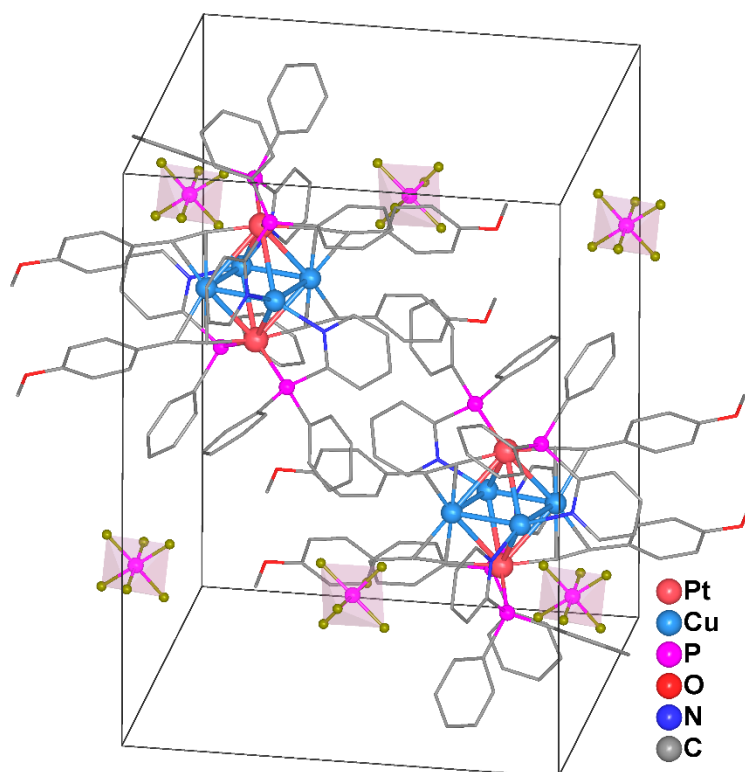

**Figure S9.** Two  $[\text{Cu}_4\text{Pt}_2(\text{MeO-C}\equiv\text{C})_4(\text{dppy})_4]^{2+}$  cluster and four  $[\text{PF}_6]^-$  anions exist in one unit cell. Color codes: Pt, pink; Cu, light blue; N, dark blue; P, purple; F, brown; O, red; C, gray.

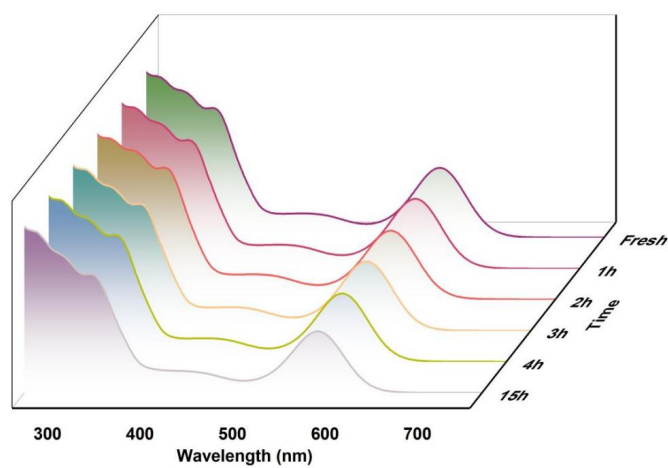

**Figure S10.** Monitoring solution-state stability of **MeO-Cu<sub>4</sub>Pt<sub>2</sub>** cluster in  $\text{CH}_2\text{Cl}_2$  under ambient conditions (25 °C in air).



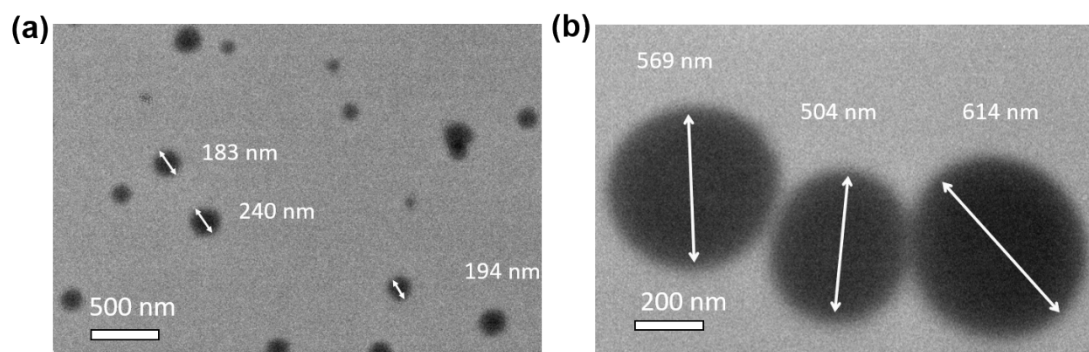

**Figure S11.** TEM images of  $\text{MeO-Cu}_4\text{Pt}_2$  in acetone with different proportions of Ethylene glycol (a) 45%; (b) 90%.

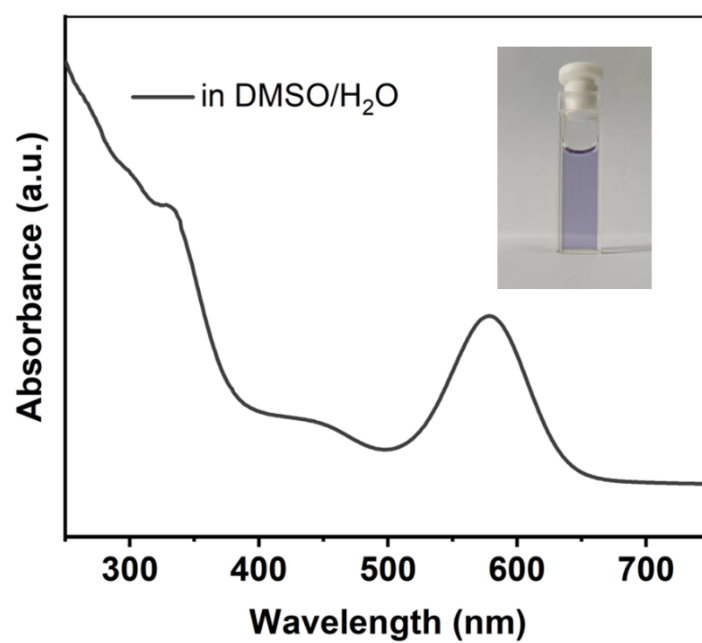

**Figure S12.** UV-vis absorption of  $\text{MeO-Cu}_4\text{Pt}_2$  in DMSO/ $\text{H}_2\text{O}$  (1:99, v/v).

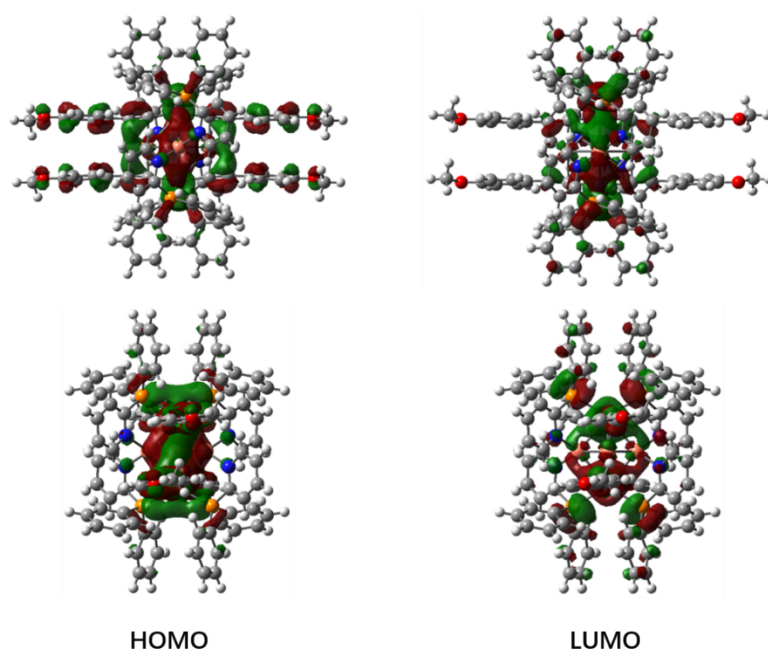

**Figure S13.** Two side views of frontier molecular orbitals for  $\text{MeO-Cu}_4\text{Pt}_2$ .

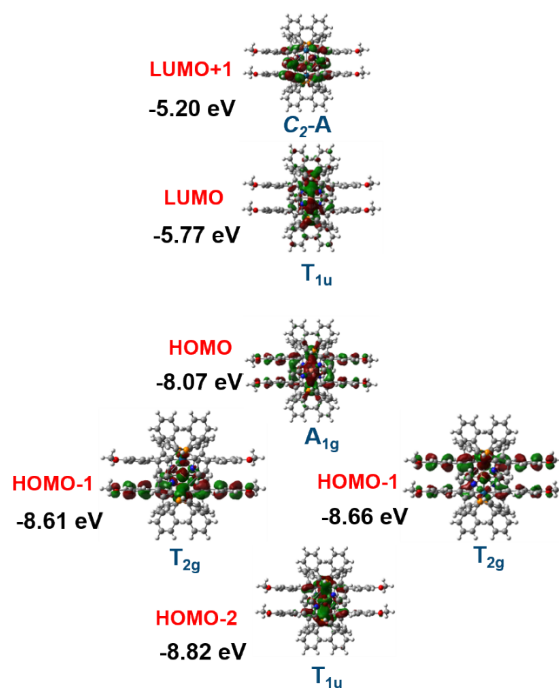

**Figure S14.** Partial frontier molecular orbital diagrams of  $\text{MeO-Cu}_4\text{Pt}_2$ .

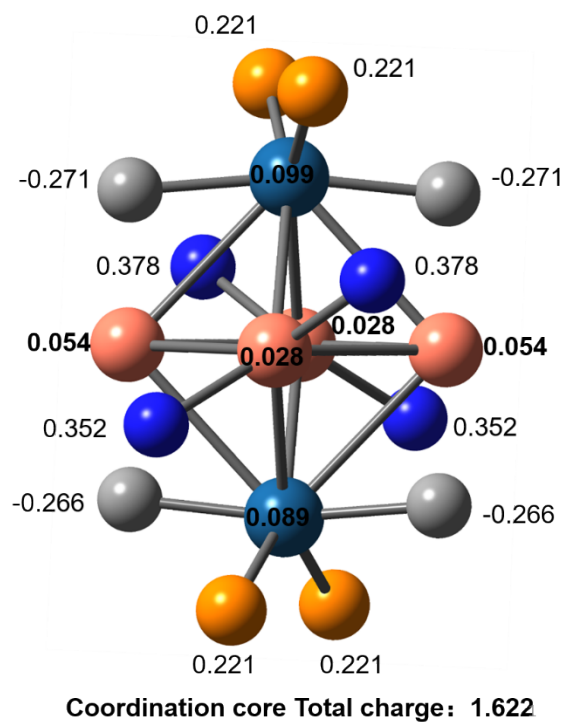

**Figure S15.** Bader charges of the metal atoms and the corresponding coordinated atoms in  $\text{MeO-Cu}_4\text{Pt}_2$ .

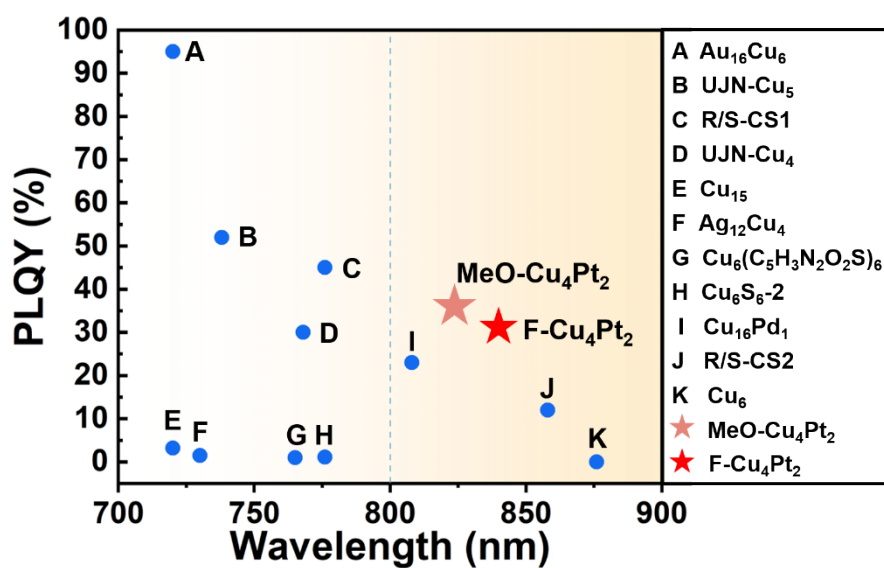

**Figure S16.** Summary of the PLQY for atomically copper-containing clusters with NIR emission.

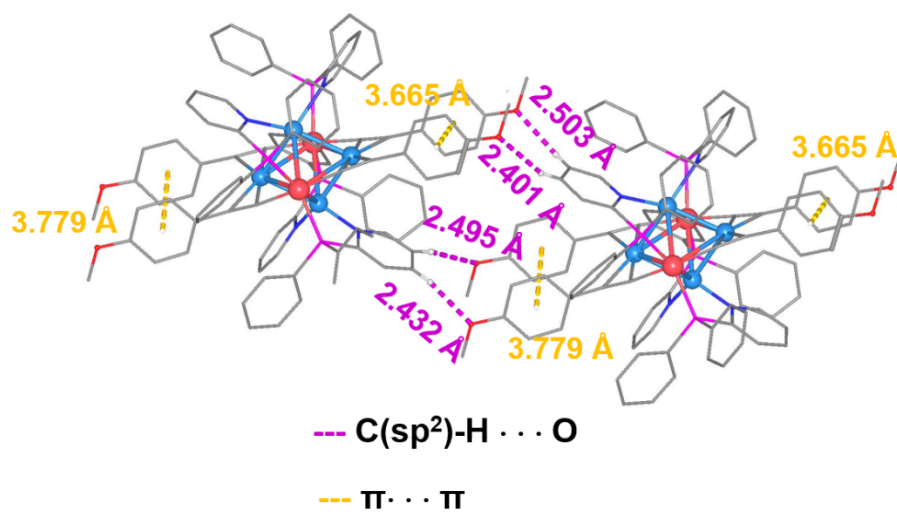

**Figure S17.** The intra- and intermolecular interactions in  $\text{MeO-Cu}_4\text{Pt}_2$ .

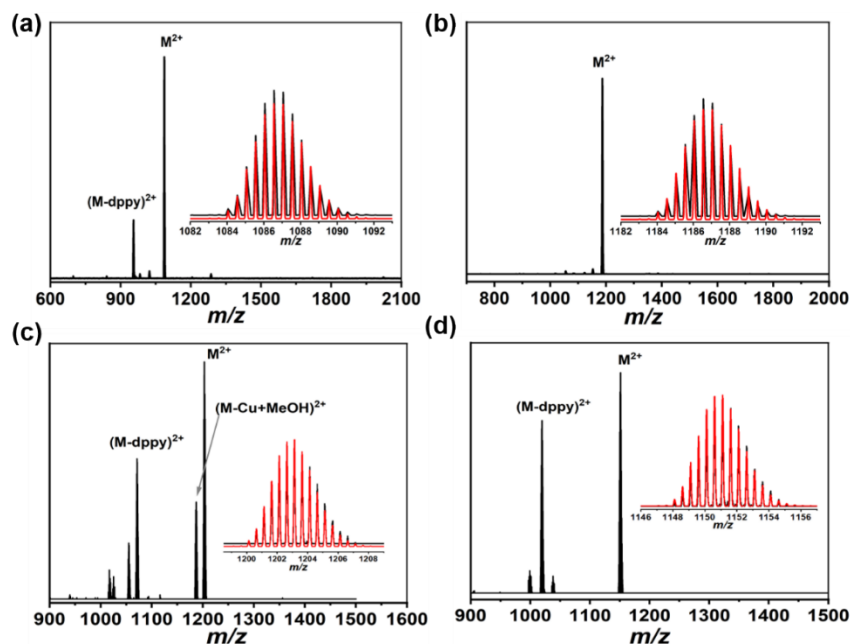

**Figure S18.** Positive mode ESI-MS spectra of **F-Cu<sub>4</sub>Pt<sub>2</sub>** (a), **CF<sub>3</sub>-Cu<sub>4</sub>Pt<sub>2</sub>** (b), **BiPh-Cu<sub>4</sub>Pt<sub>2</sub>** (c), and **Nap-Cu<sub>4</sub>Pt<sub>2</sub>** (d). Insets: the measured (black line) and simulated (red line) isotopic distribution patterns of the corresponding molecular ion peaks.

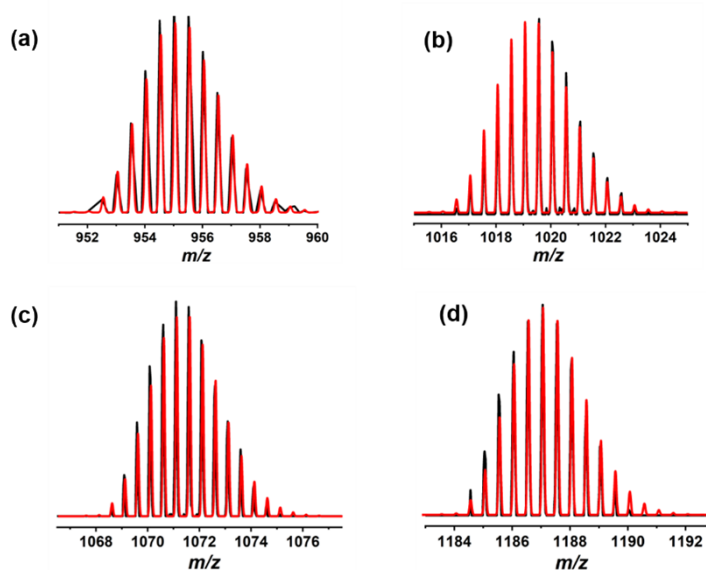

**Figure S19.** Experimental (black trace) and simulated (red trace) isotopic patterns of corresponding fragment ion peaks for (a)  $[\text{Cu}_4\text{Pt}_2(\text{F-C}_6\text{H}_5\text{-C}\equiv\text{C})_4(\text{dppy})_3]^{2+}$  (calcd.  $m/z$  955.31) of **F-Cu<sub>4</sub>Pt<sub>2</sub>**, (b)  $[\text{Cu}_4\text{Pt}_2(\text{Nap-C}\equiv\text{C})_4(\text{dppy})_3]^{2+}$  (calcd.  $m/z$  1019.45) of **Nap-Cu<sub>4</sub>Pt<sub>2</sub>**, (c)  $[\text{Cu}_4\text{Pt}_2(\text{BiPh-C}\equiv\text{C})_4(\text{dppy})_3]^{2+}$  (calcd.  $m/z$  1071.52) of **BiPh-Cu<sub>4</sub>Pt<sub>2</sub>**, and (d)  $[\text{Cu}_3\text{Pt}_2(\text{BiPh-C}\equiv\text{C})_4(\text{dppy})_4\text{CH}_3\text{OH}]^{2+}$  (calcd.  $m/z$  1187.41) of **Biph-Cu<sub>4</sub>Pt<sub>2</sub>**.

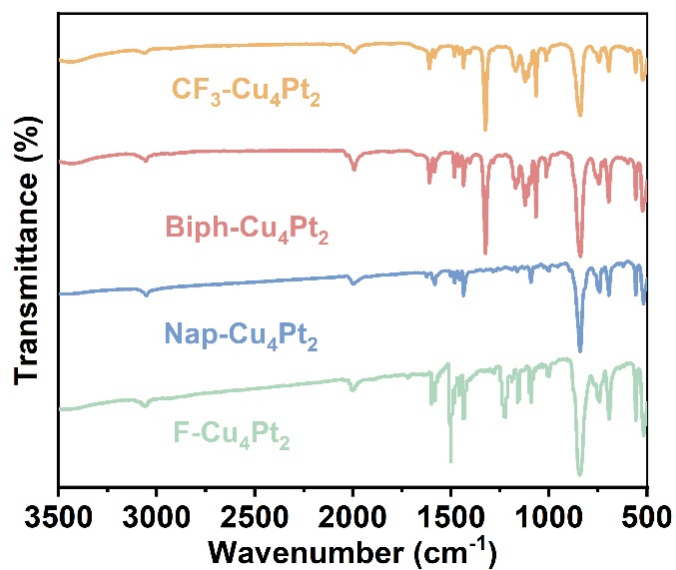

**Figure S20** FT-IR spectra of four  $\text{Cu}_4\text{Pt}_2$  crystal samples.

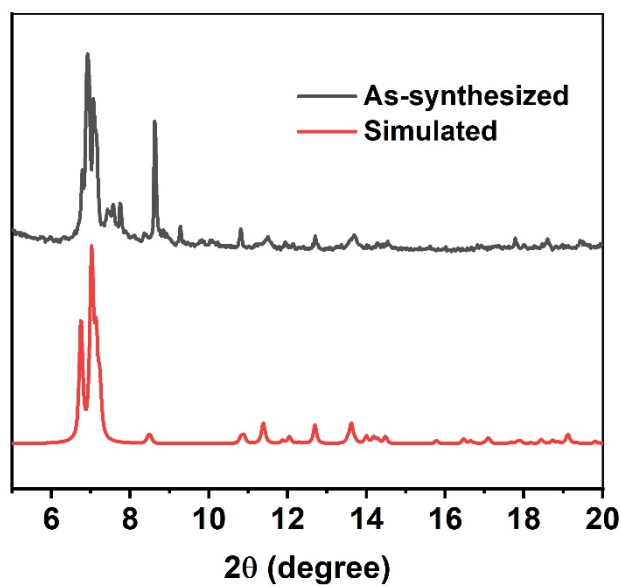

**Figure S21.** The comparison of simulated and as-synthesized PXRD patterns of  $\text{F-Cu}_4\text{Pt}_2$ .

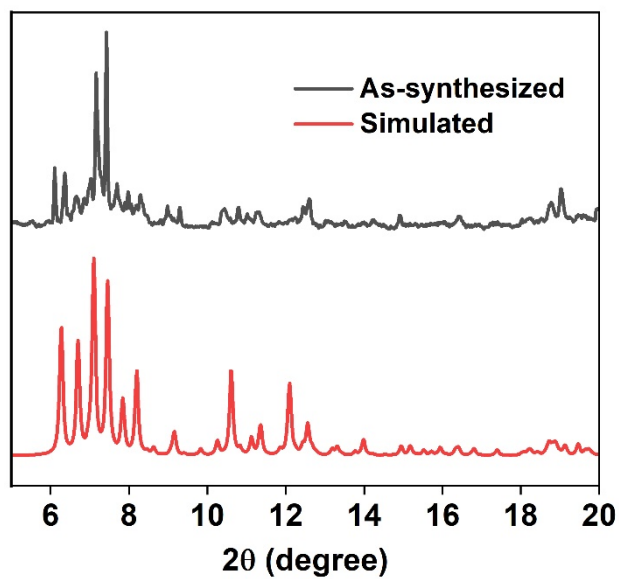

**Figure S22.** The comparison of simulated and as-synthesized PXRD patterns of **CF<sub>3</sub>-Cu<sub>4</sub>Pt<sub>2</sub>**.

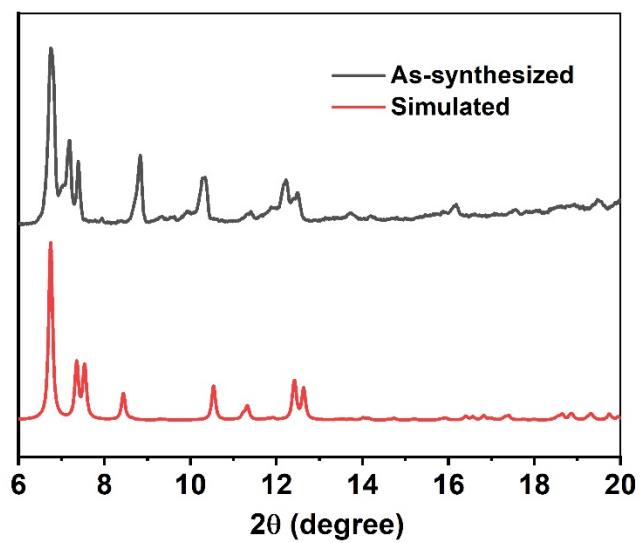

**Figure S23.** The comparison of simulated and as-synthesized PXRD patterns of **Biph-Cu<sub>4</sub>Pt<sub>2</sub>**.

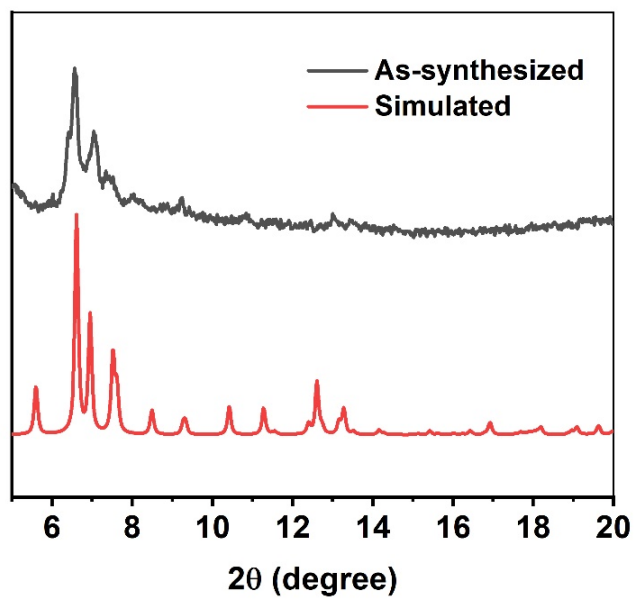

**Figure S24.** The powder XRD pattern of experimental (black) and simulation (red) of  $\text{Nap-Cu}_4\text{Pt}_2$ .

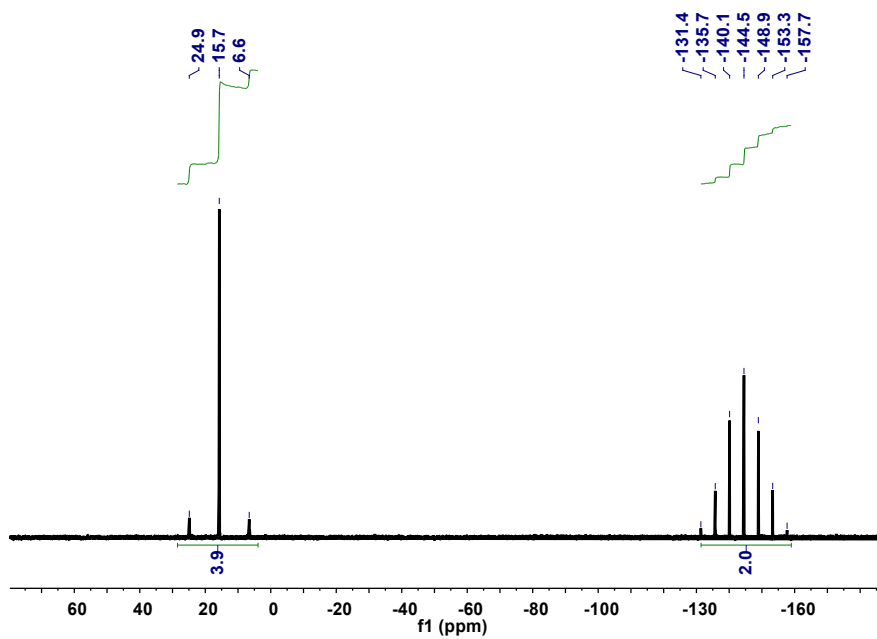

**Figure S25.**  $^{31}\text{P}$  NMR spectrum of the  $\text{F-Cu}_4\text{Pt}_2$ .



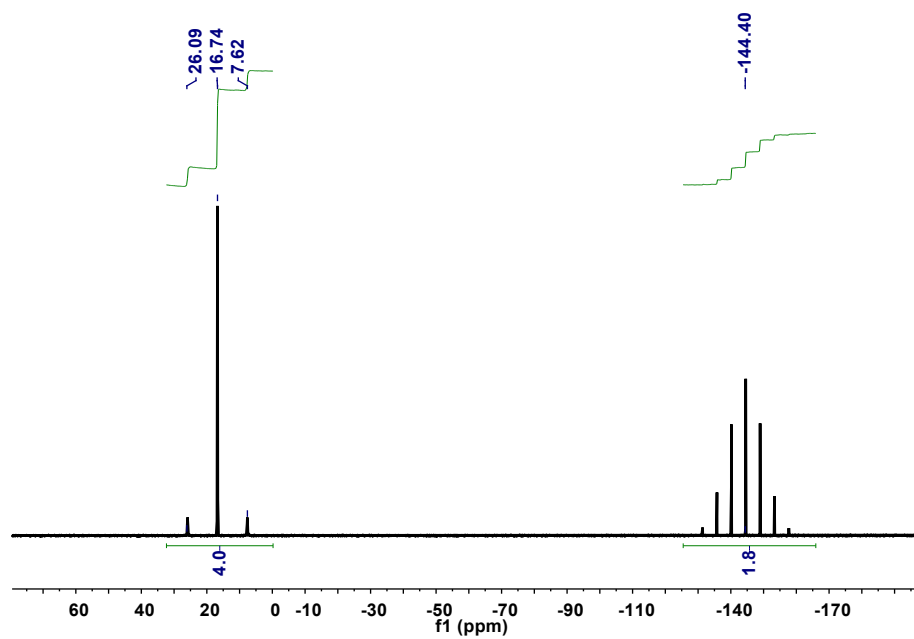

Figure S26.  $^{31}\text{P}$  NMR spectrum of  $\text{CF}_3\text{-Cu}_4\text{Pt}_2$ .

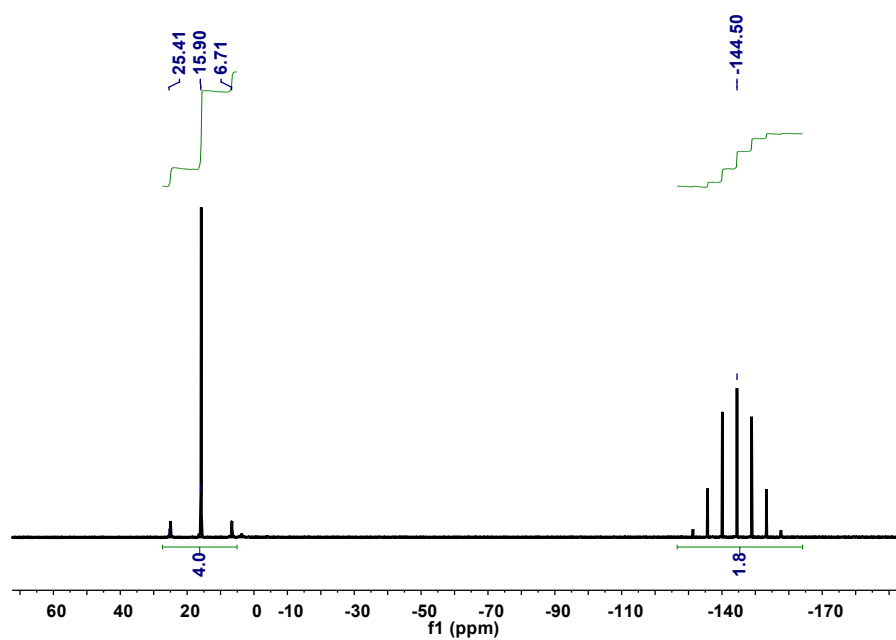

Figure S27.  $^{31}\text{P}$  NMR spectrum of  $\text{Nap-Cu}_4\text{Pt}_2$ .

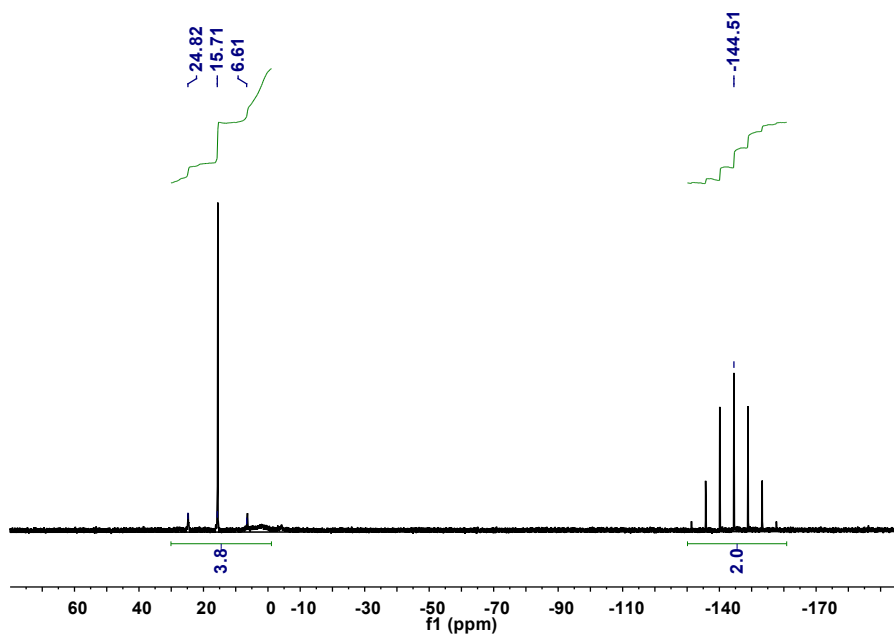

**Figure S28.**  $^{31}\text{P}$  NMR spectrum of **Biph-Cu<sub>4</sub>Pt<sub>2</sub>**.

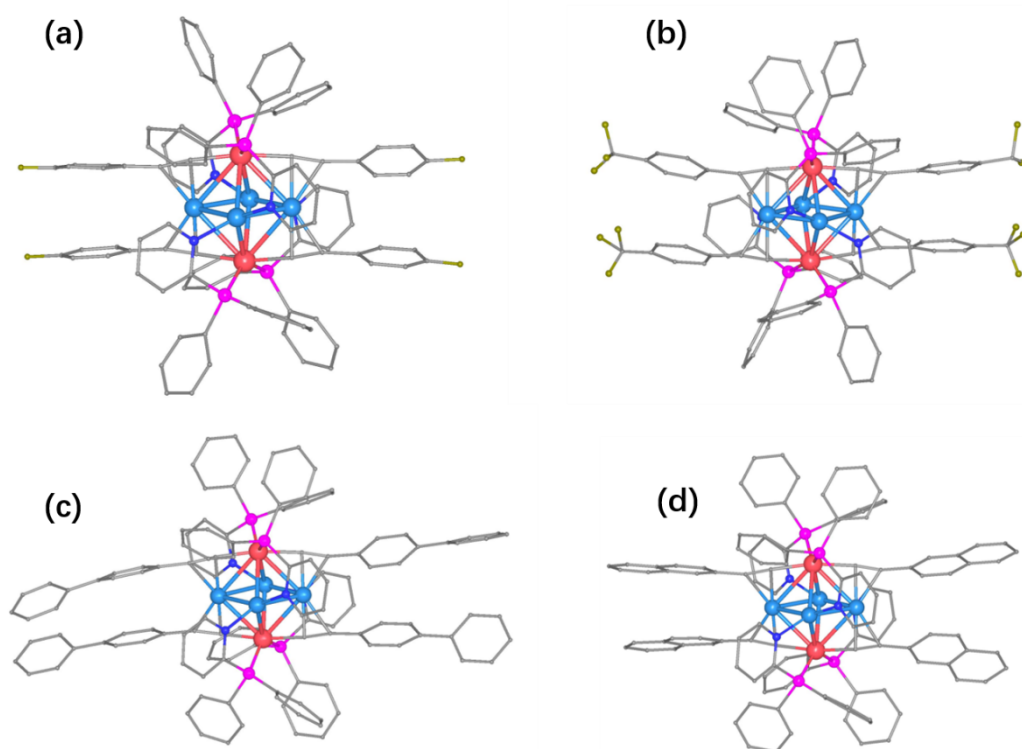

**Figure S29.** The total crystal structure of (a) **F-Cu<sub>4</sub>Pt<sub>2</sub>**, (b) **CF<sub>3</sub>-Cu<sub>4</sub>Pt<sub>2</sub>**, (c) **Nap-Cu<sub>4</sub>Pt<sub>2</sub>**, and (d) **Biph-Cu<sub>4</sub>Pt<sub>2</sub>**. Color codes: Pt, pink; Cu, light blue; N, dark blue; P, purple; F, green; O, red; C, gray.

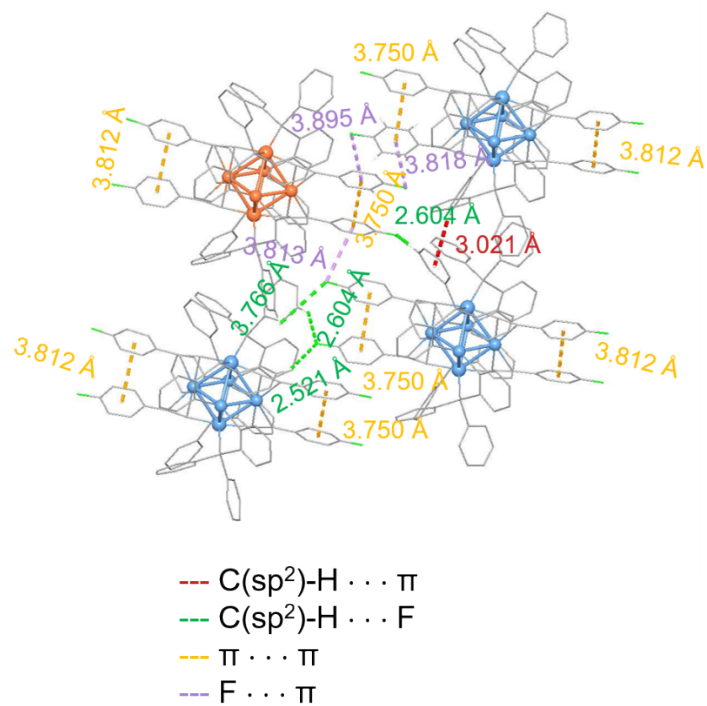

**Figure S30.** Illustration of the inter- and intramolecular interactions within **F-Cu<sub>4</sub>Pt<sub>2</sub>**.

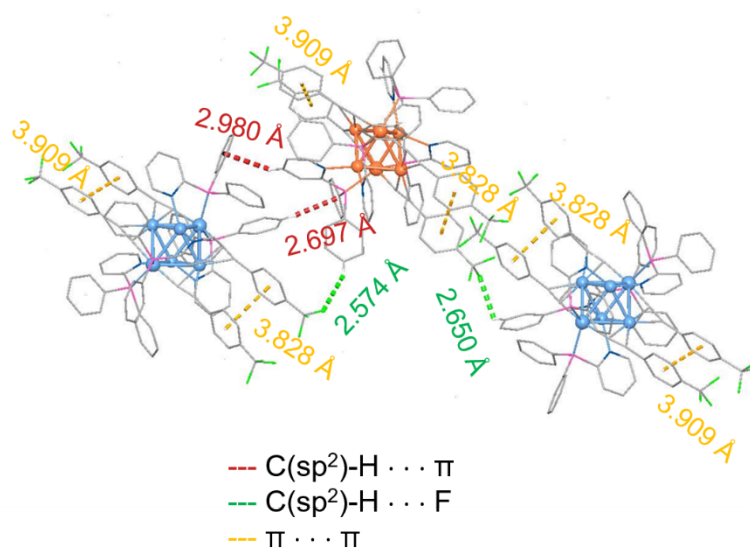

**Figure S31.** Illustration of the inter- and intramolecular interactions within **CF<sub>3</sub>-Cu<sub>4</sub>Pt<sub>2</sub>**.

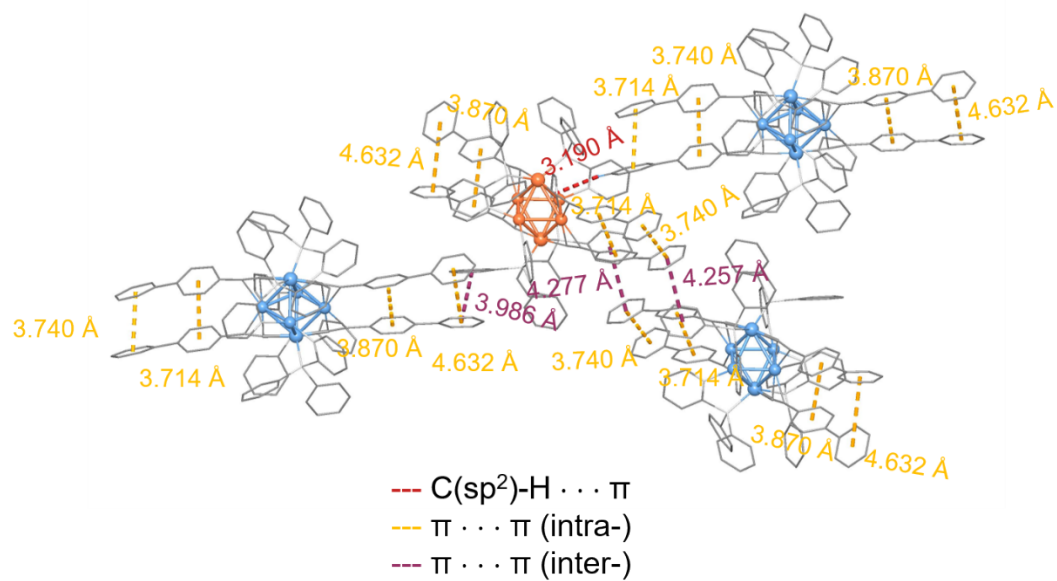

**Figure S32.** Illustration of the inter- and intramolecular interactions within **Biph-Cu<sub>4</sub>Pt<sub>2</sub>**.

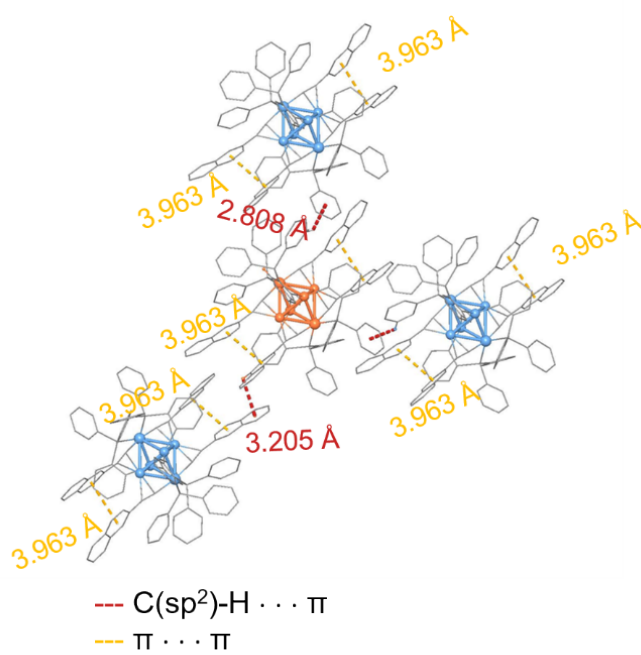

**Figure S33.** Illustration of the inter- and intramolecular interactions within **Nap-Cu<sub>4</sub>Pt<sub>2</sub>**.

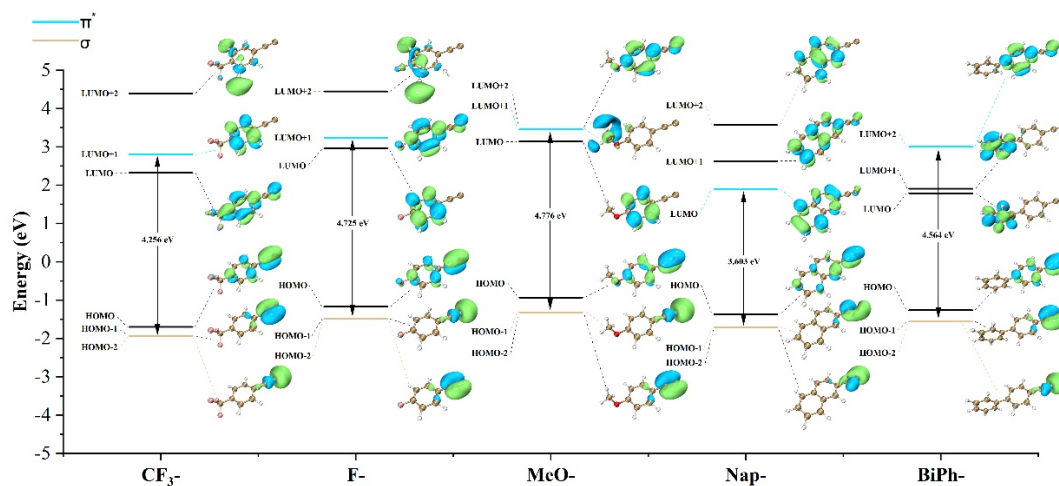

**Figure S34.** The molecular orbitals contour maps of the alkynyl ligands for F-/CF<sub>3</sub>-/Biph-/Nap-Cu<sub>4</sub>Pt<sub>2</sub>.

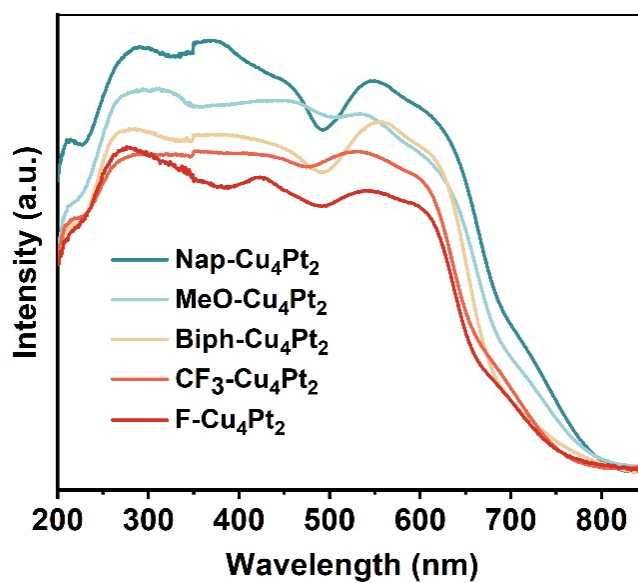

**Figure S35.** UV-vis DRS of five Cu<sub>4</sub>Pt<sub>2</sub> crystal samples.

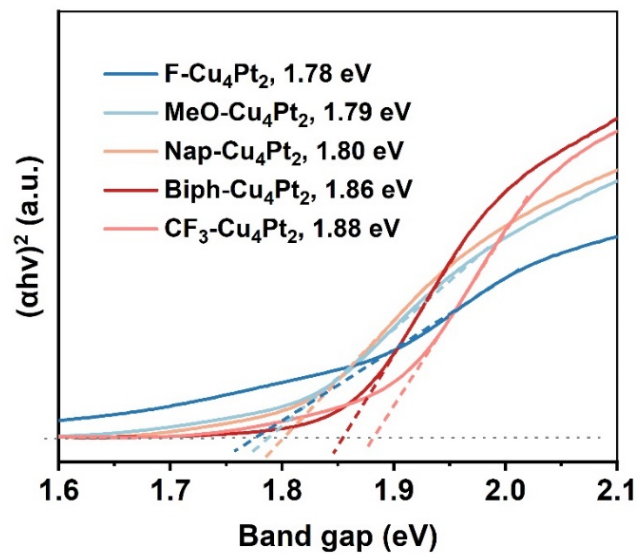

**Figure S36.** The optical gap of all **R-Cu<sub>4</sub>Pt<sub>2</sub>** clusters.

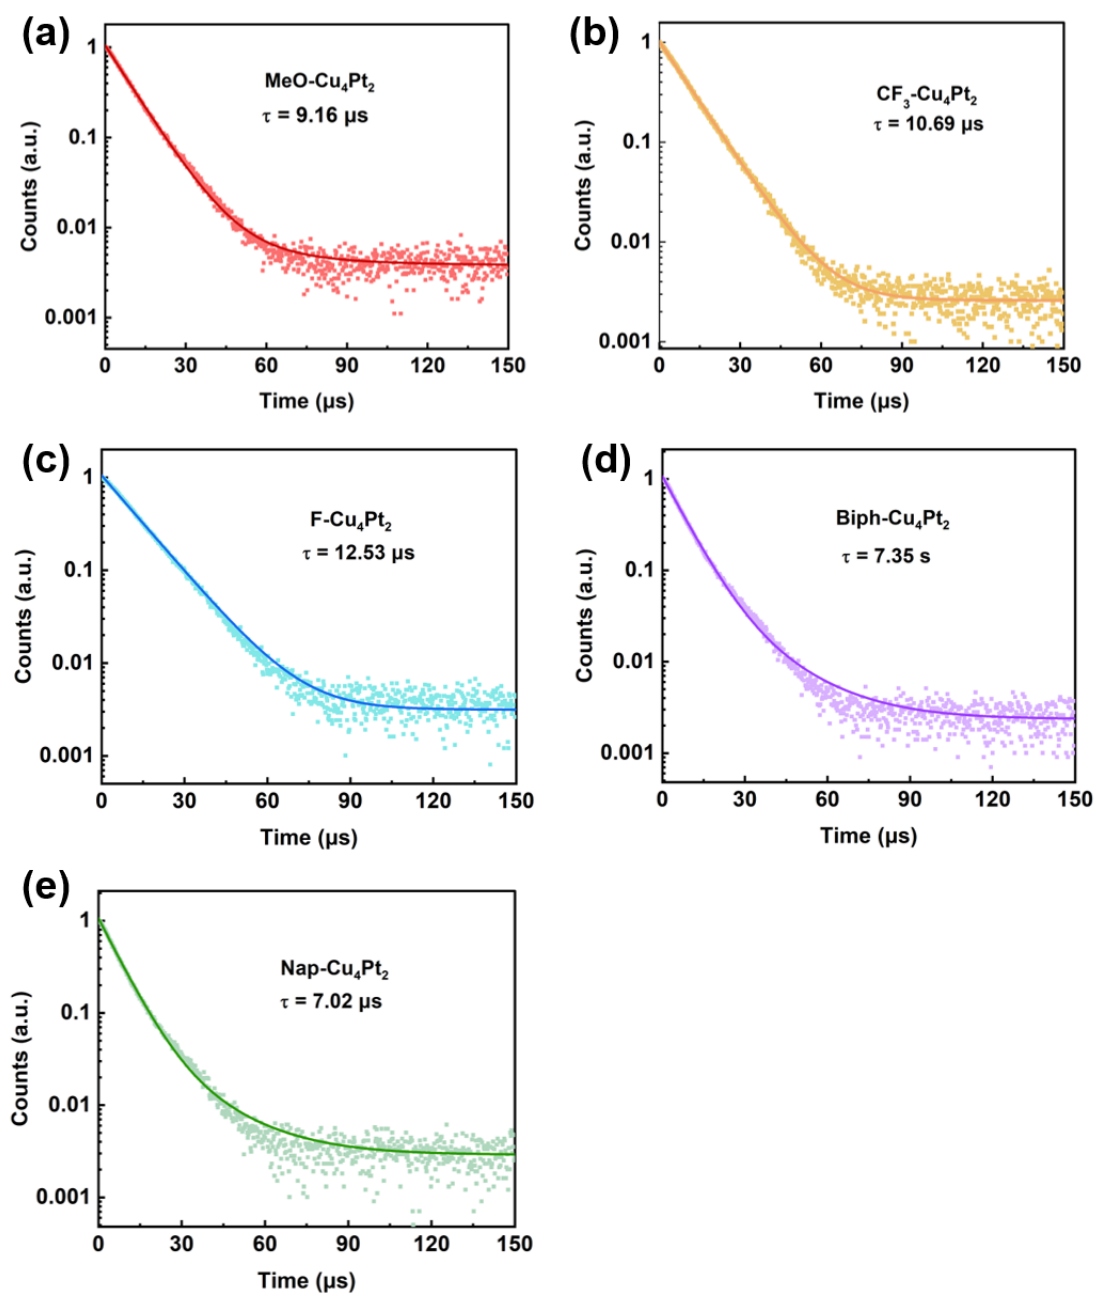

**Figure S37.** PL decay profiles of  $R\text{-Cu}_4\text{Pt}_2$  in the crystalline state at room temperature, which uses the single exponential function.

**Table S1.** Summary of NIR luminescence properties of all reported atomically metal nanoclusters.

|   | <b>Sample</b>                                                                                | <b>State</b> | $\lambda_{em}$ (nm) | <b>QY (%)</b> | <b>Ref.</b>      |
|---|----------------------------------------------------------------------------------------------|--------------|---------------------|---------------|------------------|
| A | Au <sub>16</sub> Cu <sub>6</sub>                                                             | solution     | 720                 | 95            | 9                |
| B | UJN-Cu <sub>5</sub>                                                                          | solid        | 738                 | 52            | 10               |
| C | R/S-CS1                                                                                      | solid        | 776                 | 45            | 11               |
| D | UJN-Cu <sub>4</sub>                                                                          | solid        | 768                 | 30            | 10               |
| E | Cu <sub>15</sub>                                                                             | solid        | 720                 | 3.2           | 12               |
| F | Ag <sub>12</sub> Cu <sub>4</sub>                                                             | solid        | 730                 | 1.5           | 13               |
| G | Cu <sub>6</sub> (C <sub>5</sub> H <sub>3</sub> N <sub>2</sub> O <sub>2</sub> S) <sub>6</sub> | solid        | 765                 | 1             | 14               |
| H | Cu <sub>6</sub> S <sub>6</sub> -2                                                            | solid        | 776                 | 1.1           | 15               |
| I | Cu <sub>16</sub> Pd <sub>1</sub>                                                             | solid        | 823                 | 23            | 16               |
| J | R/S-CS2                                                                                      | solid        | 858                 | 12            | 11               |
| K | Cu <sub>6</sub>                                                                              | solid        | 876                 | 0.01          | 17               |
| - | Cu <sub>28</sub>                                                                             | solid        | 750                 | --            | 18               |
| - | [(SbiPr <sub>3</sub> ) <sub>4</sub> Cu <sub>4</sub> (I) <sub>4</sub> ]                       | solid        | 711                 | --            | 19               |
| - | Au <sub>13</sub> Cu <sub>2</sub>                                                             | solid        | 1006                | --            | 20               |
| - | Au <sub>13</sub> Cu <sub>4</sub>                                                             | solid        | 965                 | --            | 20               |
| - | Cu <sub>15</sub> -a                                                                          | solid        | 726                 | --            | 21               |
| - | Cu <sub>15</sub> -c                                                                          | solid        | 820                 | --            | 21               |
| - | Cu <sub>31</sub>                                                                             | solid        | 1250                | --            | 22               |
| - | Cu <sub>15</sub>                                                                             | solid        | 710                 | --            | 23               |
|   | [Ag <sub>29</sub> (BDT) <sub>12</sub> (PPh <sub>3</sub> ) <sub>4</sub> ] <sup>3-</sup>       | solution     | 715                 | 27.5          | 24               |
|   | [Au <sub>13</sub> (NHCBn) <sub>9</sub> Cl <sub>3</sub> ] <sup>2+</sup>                       | solution     | 730                 | 16            | 25               |
|   | Pt <sub>1</sub> Ag <sub>30</sub> -SbF <sub>6</sub>                                           | solution     | 740                 | 54            | 26               |
|   | R /S-Ag <sub>17</sub>                                                                        | solid        | 745                 | 8             | 27               |
|   | [Au <sub>21</sub> (SR) <sub>12</sub> (PCP)] <sup>+</sup> /PS                                 | solution     | 750                 | 40            | 28               |
| - | Ag <sub>29</sub> (BDT) <sub>12</sub> (TPP) <sub>4</sub> NC                                   | solution     | 770                 | 39            | 29               |
|   | [Au <sub>20</sub> (CZ-PrA) <sub>16</sub> ] <sup>2-</sup>                                     | solution     | 820                 | 1.42          | 30               |
|   | Au <sub>42</sub> (SR) <sub>32</sub>                                                          | solution     | 875                 | 3.2           | 31               |
|   | Au <sub>52</sub> ( <i>p</i> -MBT) <sub>32</sub>                                              | solution     | 900-938             | 18.3          | 32               |
|   | Au <sub>38</sub> S <sub>2</sub> (S-Adm) <sub>20</sub>                                        | solution     | 910                 | 15            | 33               |
|   | Au <sub>24</sub>                                                                             | solution     | 925                 | 12            | 34               |
|   | [Au <sub>20</sub> (CZ-PrA) <sub>16</sub> ] <sup>2-</sup>                                     | solution     | 940                 | 4.84          | 30               |
|   | Au <sub>25</sub> rod                                                                         | solution     | 990                 | 8             | 35               |
|   | MeO-Cu <sub>4</sub> Pt <sub>2</sub>                                                          | solid        | 824                 | 36            | <b>this work</b> |
|   | F-Cu <sub>4</sub> Pt <sub>2</sub>                                                            | solid        | 840                 | 31            | <b>this work</b> |



**Table S2.** Crystal data and structure refinement for **MeO-Cu<sub>4</sub>Pt<sub>2</sub>**.

| Identification code                                          | <b>MeO-Cu<sub>4</sub>Pt<sub>2</sub></b>                                                                                                         |
|--------------------------------------------------------------|-------------------------------------------------------------------------------------------------------------------------------------------------|
| Empirical formula                                            | C <sub>211</sub> H <sub>174</sub> N <sub>8</sub> O <sub>8</sub> F <sub>24</sub> P <sub>12</sub> Cl <sub>6</sub> Cu <sub>8</sub> Pt <sub>4</sub> |
| Formula weight                                               | 5278.59                                                                                                                                         |
| Temperature/K                                                | 173.00(10)                                                                                                                                      |
| Crystal system                                               | triclinic                                                                                                                                       |
| Space group                                                  | <i>P</i> -1                                                                                                                                     |
| <i>a</i> /Å                                                  | 14.8492(3)                                                                                                                                      |
| <i>b</i> /Å                                                  | 15.4702(4)                                                                                                                                      |
| <i>c</i> /Å                                                  | 22.7707(6)                                                                                                                                      |
| $\alpha$ /°                                                  | 89.501(2)                                                                                                                                       |
| $\beta$ /°                                                   | 84.631(2)                                                                                                                                       |
| $\gamma$ /°                                                  | 86.3650(19)                                                                                                                                     |
| Volume/Å <sup>3</sup>                                        | 5197.4(2)                                                                                                                                       |
| <i>Z</i>                                                     | 1                                                                                                                                               |
| $\rho_{calc}$ g/cm <sup>3</sup>                              | 1.686                                                                                                                                           |
| $\mu$ /mm <sup>-1</sup>                                      | 8.008                                                                                                                                           |
| <i>F</i> (000)                                               | 2602.0                                                                                                                                          |
| Crystal size/mm <sup>3</sup>                                 | 0.2 × 0.15 × 0.12                                                                                                                               |
| Radiation                                                    | CuK $\alpha$ ( $\lambda$ = 1.54184)                                                                                                             |
| 2 $\Theta$ range for data collection/°                       | 6.836 to 130.288                                                                                                                                |
| Index ranges                                                 | -13 ≤ <i>h</i> ≤ 17, -14 ≤ <i>k</i> ≤ 18, -26 ≤ <i>l</i> ≤ 26                                                                                   |
| Reflections collected                                        | 31741                                                                                                                                           |
| Independent reflections                                      | 17173 [ <i>R</i> <sub>int</sub> = 0.0403, <i>R</i> <sub>sigma</sub> = 0.0565]                                                                   |
| Data/restraints/parameters                                   | 17173/36/1283                                                                                                                                   |
| Goodness-of-fit on <i>F</i> <sup>2</sup>                     | 1.113                                                                                                                                           |
| Final <i>R</i> indexes [ <i>I</i> ≥ 2 $\sigma$ ( <i>I</i> )] | <i>R</i> <sub>1</sub> = 0.0393, <i>wR</i> <sub>2</sub> = 0.0976                                                                                 |
| Final <i>R</i> indexes [all data]                            | <i>R</i> <sub>1</sub> = 0.0520, <i>wR</i> <sub>2</sub> = 0.1030                                                                                 |
| Largest diff. peak/hole / e Å <sup>-3</sup>                  | 1.70/-0.94                                                                                                                                      |

**Table S3.** Crystal data and structure refinement for **F-Cu<sub>4</sub>Pt<sub>2</sub>**.

| Identification code                                          | <b>F-Cu<sub>4</sub>Pt<sub>2</sub></b>                                                                                          |
|--------------------------------------------------------------|--------------------------------------------------------------------------------------------------------------------------------|
| Empirical formula                                            | C <sub>101</sub> H <sub>74</sub> N <sub>4</sub> F <sub>16</sub> P <sub>6</sub> Cl <sub>2</sub> Cu <sub>4</sub> Pt <sub>2</sub> |
| Formula weight                                               | 2548.70                                                                                                                        |
| Temperature/K                                                | 173.00(10)                                                                                                                     |
| Crystal system                                               | monoclinic                                                                                                                     |
| Space group                                                  | <i>P</i> 2 <sub>1</sub> / <i>c</i>                                                                                             |
| <i>a</i> /Å                                                  | 27.8806(11)                                                                                                                    |
| <i>b</i> /Å                                                  | 14.6603(4)                                                                                                                     |
| <i>c</i> /Å                                                  | 29.4612(11)                                                                                                                    |
| <i>α</i> /°                                                  | 90                                                                                                                             |
| <i>β</i> /°                                                  | 117.331(5)                                                                                                                     |
| <i>γ</i> /°                                                  | 90                                                                                                                             |
| Volume/Å <sup>3</sup>                                        | 10697.7(8)                                                                                                                     |
| <i>Z</i>                                                     | 4                                                                                                                              |
| $\rho_{calc}$ g/cm <sup>3</sup>                              | 1.582                                                                                                                          |
| $\mu$ /mm <sup>-1</sup>                                      | 7.562                                                                                                                          |
| <i>F</i> (000)                                               | 4992.0                                                                                                                         |
| Crystal size/mm <sup>3</sup>                                 | 0.1 × 0.08 × 0.06                                                                                                              |
| Radiation                                                    | CuK $\alpha$ ( $\lambda$ = 1.54184)                                                                                            |
| 2 $\Theta$ range for data collection/°                       | 6.91 to 130.08                                                                                                                 |
| Index ranges                                                 | -32 ≤ <i>h</i> ≤ 23, -17 ≤ <i>k</i> ≤ 16, -34 ≤ <i>l</i> ≤ 33                                                                  |
| Reflections collected                                        | 36737                                                                                                                          |
| Independent reflections                                      | 17554 [ <i>R</i> <sub>int</sub> = 0.0700, <i>R</i> <sub>sigma</sub> = 0.0942]                                                  |
| Data/restraints/parameters                                   | 17554/384/1219                                                                                                                 |
| Goodness-of-fit on <i>F</i> <sup>2</sup>                     | 1.033                                                                                                                          |
| Final <i>R</i> indexes [ <i>I</i> ≥ 2 $\sigma$ ( <i>I</i> )] | <i>R</i> <sub>1</sub> = 0.0947, <i>wR</i> <sub>2</sub> = 0.2342                                                                |
| Final <i>R</i> indexes [all data]                            | <i>R</i> <sub>1</sub> = 0.1368, <i>wR</i> <sub>2</sub> = 0.2639                                                                |
| Largest diff. peak/hole / e Å <sup>-3</sup>                  | 3.20/-2.32                                                                                                                     |

**Table S4.** Crystal data and structure refinement for **CF<sub>3</sub>-Cu<sub>4</sub>Pt<sub>2</sub>**.

| Identification code                                          | <b>CF<sub>3</sub>-Cu<sub>4</sub>Pt<sub>2</sub></b>                                                                             |
|--------------------------------------------------------------|--------------------------------------------------------------------------------------------------------------------------------|
| Empirical formula                                            | C <sub>105</sub> H <sub>74</sub> N <sub>4</sub> F <sub>24</sub> P <sub>6</sub> Cl <sub>2</sub> Cu <sub>4</sub> Pt <sub>2</sub> |
| Formula weight                                               | 2748.74                                                                                                                        |
| Temperature/K                                                | 173.00(10)                                                                                                                     |
| Crystal system                                               | monoclinic                                                                                                                     |
| Space group                                                  | <i>P</i> 2 <sub>1</sub> / <i>c</i>                                                                                             |
| <i>a</i> /Å                                                  | 30.1604(8)                                                                                                                     |
| <i>b</i> /Å                                                  | 14.9159(3)                                                                                                                     |
| <i>c</i> /Å                                                  | 25.3705(8)                                                                                                                     |
| <i>α</i> /°                                                  | 90                                                                                                                             |
| <i>β</i> /°                                                  | 110.963(3)                                                                                                                     |
| <i>γ</i> /°                                                  | 90                                                                                                                             |
| Volume/Å <sup>3</sup>                                        | 10658.0(5)                                                                                                                     |
| <i>Z</i>                                                     | 4                                                                                                                              |
| $\rho_{calc}$ g/cm <sup>3</sup>                              | 1.713                                                                                                                          |
| $\mu$ /mm <sup>-1</sup>                                      | 7.753                                                                                                                          |
| <i>F</i> (000)                                               | 5376.0                                                                                                                         |
| Crystal size/mm <sup>3</sup>                                 | 0.15 × 0.12 × 0.08                                                                                                             |
| Radiation                                                    | Cu K $\alpha$ ( $\lambda$ = 1.54184)                                                                                           |
| 2 $\Theta$ range for data collection/°                       | 7.004 to 130.074                                                                                                               |
| Index ranges                                                 | -35 ≤ <i>h</i> ≤ 23, -16 ≤ <i>k</i> ≤ 17, -29 ≤ <i>l</i> ≤ 28                                                                  |
| Reflections collected                                        | 35641                                                                                                                          |
| Independent reflections                                      | 17574 [ <i>R</i> <sub>int</sub> = 0.0646, <i>R</i> <sub>sigma</sub> = 0.0904]                                                  |
| Data/restraints/parameters                                   | 17574/244/1405                                                                                                                 |
| Goodness-of-fit on <i>F</i> <sup>2</sup>                     | 1.039                                                                                                                          |
| Final <i>R</i> indexes [ <i>I</i> ≥ 2 $\sigma$ ( <i>I</i> )] | <i>R</i> <sub>1</sub> = 0.0596, <i>wR</i> <sub>2</sub> = 0.1366                                                                |
| Final <i>R</i> indexes [all data]                            | <i>R</i> <sub>1</sub> = 0.0948, <i>wR</i> <sub>2</sub> = 0.1548                                                                |
| Largest diff. peak/hole / e Å <sup>-3</sup>                  | 1.46/-1.34                                                                                                                     |

**Table S5.** Crystal data and structure refinement for **BiPh-Cu<sub>4</sub>Pt<sub>2</sub>**.

| Identification code                                          | <b>BiPh-Cu<sub>4</sub>Pt<sub>2</sub></b>                                                                        |
|--------------------------------------------------------------|-----------------------------------------------------------------------------------------------------------------|
| Empirical formula                                            | C <sub>138</sub> H <sub>108</sub> N <sub>4</sub> F <sub>12</sub> P <sub>6</sub> Cu <sub>4</sub> Pt <sub>2</sub> |
| Formula weight                                               | 2878.42                                                                                                         |
| Temperature/K                                                | 100.00(11)                                                                                                      |
| Crystal system                                               | monoclinic                                                                                                      |
| Space group                                                  | <i>P</i> 2 <sub>1</sub> / <i>c</i>                                                                              |
| <i>a</i> /Å                                                  | 24.0292(3)                                                                                                      |
| <i>b</i> /Å                                                  | 23.4432(3)                                                                                                      |
| <i>c</i> /Å                                                  | 20.9407(3)                                                                                                      |
| <i>α</i> /°                                                  | 90                                                                                                              |
| <i>β</i> /°                                                  | 90.2540(10)                                                                                                     |
| <i>γ</i> /°                                                  | 90                                                                                                              |
| Volume/Å <sup>3</sup>                                        | 11796.2(3)                                                                                                      |
| <i>Z</i>                                                     | 4                                                                                                               |
| $\rho_{calc}$ g/cm <sup>3</sup>                              | 1.621                                                                                                           |
| $\mu$ /mm <sup>-1</sup>                                      | 6.480                                                                                                           |
| <i>F</i> (000)                                               | 5728.0                                                                                                          |
| Crystal size/mm <sup>3</sup>                                 | 0.15 × 0.1 × 0.1                                                                                                |
| Radiation                                                    | CuK $\alpha$ ( $\lambda$ = 1.54184)                                                                             |
| 2 $\Theta$ range for data collection/°                       | 5.266 to 119.988                                                                                                |
| Index ranges                                                 | -26 ≤ <i>h</i> ≤ 16, -26 ≤ <i>k</i> ≤ 26, -23 ≤ <i>l</i> ≤ 23                                                   |
| Reflections collected                                        | 49189                                                                                                           |
| Independent reflections                                      | 16568 [ <i>R</i> <sub>int</sub> = 0.0542, <i>R</i> <sub>sigma</sub> = 0.0682]                                   |
| Data/restraints/parameters                                   | 16568/228/1473                                                                                                  |
| Goodness-of-fit on <i>F</i> <sup>2</sup>                     | 1.021                                                                                                           |
| Final <i>R</i> indexes [ <i>I</i> ≥ 2 $\sigma$ ( <i>I</i> )] | <i>R</i> <sub>1</sub> = 0.0584, <i>wR</i> <sub>2</sub> = 0.1495                                                 |
| Final <i>R</i> indexes [all data]                            | <i>R</i> <sub>1</sub> = 0.0752, <i>wR</i> <sub>2</sub> = 0.1577                                                 |
| Largest diff. peak/hole / e Å <sup>-3</sup>                  | 2.08/-1.29                                                                                                      |

**Table S6.** Crystal data and structure refinement for **Nap-Cu<sub>4</sub>Pt<sub>2</sub>**.

| Identification code                                          | <b>Nap-Cu<sub>4</sub>Pt<sub>2</sub></b>                                                                        |
|--------------------------------------------------------------|----------------------------------------------------------------------------------------------------------------|
| Empirical formula                                            | C <sub>116</sub> H <sub>84</sub> N <sub>4</sub> F <sub>12</sub> P <sub>6</sub> Cu <sub>4</sub> Pt <sub>2</sub> |
| Formula weight                                               | 2592.03                                                                                                        |
| Temperature/K                                                | 100.01(11)                                                                                                     |
| Crystal system                                               | monoclinic                                                                                                     |
| Space group                                                  | <i>C2/c</i>                                                                                                    |
| <i>a</i> /Å                                                  | 22.2403(3)                                                                                                     |
| <i>b</i> /Å                                                  | 19.9911(2)                                                                                                     |
| <i>c</i> /Å                                                  | 22.5255(3)                                                                                                     |
| <i>α</i> /°                                                  | 90                                                                                                             |
| <i>β</i> /°                                                  | 94.3900(10)                                                                                                    |
| <i>γ</i> /°                                                  | 90                                                                                                             |
| Volume/Å <sup>3</sup>                                        | 9985.6(2)                                                                                                      |
| <i>Z</i>                                                     | 4                                                                                                              |
| $\rho_{calc}$ g/cm <sup>3</sup>                              | 1.724                                                                                                          |
| $\mu$ /mm <sup>-1</sup>                                      | 7.575                                                                                                          |
| <i>F</i> (000)                                               | 5112.0                                                                                                         |
| Crystal size/mm <sup>3</sup>                                 | 0.15 × 0.1 × 0.08                                                                                              |
| Radiation                                                    | CuK $\alpha$ ( $\lambda$ = 1.54184)                                                                            |
| 2 $\Theta$ range for data collection/°                       | 5.952 to 156.528                                                                                               |
| Index ranges                                                 | -13 ≤ <i>h</i> ≤ 28, -24 ≤ <i>k</i> ≤ 21, -27 ≤ <i>l</i> ≤ 27                                                  |
| Reflections collected                                        | 22880                                                                                                          |
| Independent reflections                                      | 10183 [ <i>R</i> <sub>int</sub> = 0.0353, <i>R</i> <sub>sigma</sub> = 0.0390]                                  |
| Data/restraints/parameters                                   | 10183/78/650                                                                                                   |
| Goodness-of-fit on <i>F</i> <sup>2</sup>                     | 1.090                                                                                                          |
| Final <i>R</i> indexes [ <i>I</i> ≥ 2 $\sigma$ ( <i>I</i> )] | <i>R</i> <sub>1</sub> = 0.0469, <i>wR</i> <sub>2</sub> = 0.1313                                                |
| Final <i>R</i> indexes [all data]                            | <i>R</i> <sub>1</sub> = 0.0527, <i>wR</i> <sub>2</sub> = 0.1350                                                |
| Largest diff. peak/hole / e Å <sup>-3</sup>                  | 1.73/-1.60                                                                                                     |

**Table S7.** Optical parameters of the absorption transition of **Cu<sub>4</sub>Pt<sub>2</sub>** clusters in CH<sub>2</sub>Cl<sub>2</sub>.

| <b>Clusters</b>                                    | $\lambda_{\text{abs}}$<br><b>(nm)</b> | $\epsilon$ (M <sup>-1</sup> cm <sup>-1</sup> )<br><b>/10<sup>4</sup></b> |
|----------------------------------------------------|---------------------------------------|--------------------------------------------------------------------------|
| <b>CF<sub>3</sub>-Cu<sub>4</sub>Pt<sub>2</sub></b> | 555                                   | 3.29                                                                     |
| <b>BiPh-Cu<sub>4</sub>Pt<sub>2</sub></b>           | 555                                   | 3.21                                                                     |
| <b>F-Cu<sub>4</sub>Pt<sub>2</sub></b>              | 559                                   | 2.72                                                                     |
| <b>Nap-Cu<sub>4</sub>Pt<sub>2</sub></b>            | 570                                   | 3.63                                                                     |
| <b>MeO-Cu<sub>4</sub>Pt<sub>2</sub></b>            | 572                                   | 3.15                                                                     |

## References

- (1) Yuan, S.-F.; Luyang, H.-W.; Lei, Z.; Wan, X.-K.; Li, J.-J.; Wang, Q.-M. A Stable Well-Defined Copper Hydride Cluster Consolidated with Hemilabile Phosphines. *Chem. Commun.* **2021**, *57*, 4315–4318.
- (2) M. J. Frisch, G. W. Trucks H. B. Schlegel G. E. Scuseria M. A. Robb J. R. Cheeseman G. Scalmani V. Barone B. Mennucci G. A. Petersson H. Nakatsuji M. Caricato X. Li H. P. Hratchian A. F. Izmaylov J. Bloino G. Zheng J. L. Sonnenberg M. Hada M. Ehara K. Toyota R. Fukuda J. Hasegawa M. Ishida T. Nakajima Y. Honda O. Kitao H. Nakai T. Vreven J. A. Montgomery Jr J. E. Peralta F. Ogliaro M. Bearpark J. J. Heyd E. Brothers K. N. Kudin V. N. Staroverov R. Kobayashi J. Normand K. Raghavachari A. Rendell J. C. Burant S. S. Iyengar J. Tomasi M. Cossi N. Rega J. M. Millam M. Klene J. E. Knox J. B. Cross V. Bakken C. Adamo J. Jaramillo R. Gomperts R. E. Stratmann O. Yazyev A. J. Austin R. Cammi C. Pomelli J. W. Ochterski R. L. Martin K. Morokuma V. G. Zakrzewski G. A. Voth P. Salvador J. J. Dannenberg S. Dapprich A. D. Daniels Ö Farkas J. B. Foresman J. V. Ortiz J. Cioslowski; Fox, D. *J. Gaussian 09, Inc. Wallingford CT* **2009**.
- (3) Becke, Axel D. Density-functional thermochemistry. III. The role of exact exchange. *J. Chem. Phys.* **1993**, *98*, 5648-5652.
- (4) Grimme, Stefan; Antony, Jens; Ehrlich, Stephan; Krieg, Helge. A consistent and accurate ab initio parametrization of density functional dispersion correction (DFT-D) for the 94 elements H-Pu. *J. Chem. Phys.* **2010**, *132*, 154104.
- (5) Igel-Mann, G; Stoll, H; Preuss, H. Pseudopotentials for main group elements (IIIa through VIIa). *Mol. Phys.* **1988**, *65*, 1321-1328.
- (6) Hariharan, Praveen C; Pople, John A. The influence of polarization functions on molecular orbital hydrogenation energies. *Theor. Chim. Acta* **1973**, *28*, 213-222.
- (7) Lu, Tian; Chen, Feiwu. Multiwfn: A multifunctional wavefunction analyzer. *J. Comput. Chem.* **2012**, *33*, 580-592.
- (8) Humphrey, William; Dalke, Andrew; Schulten, Klaus. VMD: Visual molecular dynamics. *J. Mol. Graph.* **1996**, *14*, 33-38.

- (9) Shi, W.-Q.; Zeng, L.; He, R.-L.; Han, X.-S.; Guan, Z.-J.; Zhou, M.; Wang, Q.-M. Near-Unity NIR Phosphorescent Quantum Yield from a Room-Temperature Solvated Metal Nanocluster. *Science* **2024**, *383*, 326–330.
- (10) Liu, G.-N.; Xu, R.-D.; Guo, J.-S.; Miao, J.-L.; Zhang, M.-J.; Li, C. Regulating the Near-Infrared Region to Visible-Light Emission by Adjusting Cuprophilic Interactions for Blue Light-Excited Phosphors. *J. Mater. Chem. C* **2021**, *9*, 8589–8595.
- (11) Han, Z.; Si, Y.; Dong, X.-Y.; Hu, J.-H.; Zhang, C.; Zhao, X.-H.; Yuan, J.-W.; Wang, Y.; Zang, S.-Q. Smart Reversible Transformations between Chiral Superstructures of Copper Clusters for Optical and Chiroptical Switching. *J. Am. Chem. Soc.* **2023**, *145*, 6166–6176.
- (12) Nematulloev, S.; Huang, R.; Yin, J.; Shkurenko, A.; Dong, C.; Ghosh, A.; Alamer, B.; Naphade, R.; Hedhili, M. N.; Maity, P.; Eddaoudi, M.; Mohammed, O. F.; Bakr, O. M.  $[\text{Cu}_{15}(\text{PPh}_3)_6(\text{PET})_{13}]^{2+}$ : A Copper Nanocluster with Crystallization Enhanced Photoluminescence. *Small* **2021**, *17*, 2006839.
- (13) Deng, G.; Lee, K.; Deng, H.; Bootharaju, M. S.; Zheng, N.; Hyeon, T. Alkynyl-Protected  $\text{Ag}_{12}\text{Cu}_4$  Cluster with Aggregation-Induced Emission Enhancement. *J. Phys. Chem. C* **2022**, *126*, 20577–20583.
- (14) Hassanein, K.; Cappuccino, C.; Marchini, M.; Bandini, E.; Christian, M.; Morandi, V.; Monti, F.; Maini, L.; Ventura, B. Novel Cu(I)-5-Nitropyridine-2-Thiol Cluster with NIR Emission: Structural and Photophysical Characterization. *J. Phys. Chem. C* **2022**, *126*, 10190–10198.
- (15) Shan, X.-C.; Jiang, F.-L.; Yuan, D.-Q.; Wu, M.-Y.; Zhang, S.-Q.; Hong, M.-C. The Unusual Thermochromic NIR Luminescence of Cu(I) Clusters: Tuned by Cu–Cu Interactions and Packing Modes. *Dalton Trans.* **2012**, *41*, 9411.
- (16) Peng, S.; Yang, H.; Luo, D.; Ning, G.; Li, D. A Highly NIR Emissive  $\text{Cu}_{16}\text{Pd}_1$  Nanocluster. *Small* **2023**, 2306863.
- (17) Ozawa, Y.; Mori, M.; Kiyooka, H.; Sugata, Y.; Ono, T.; Abe, M. Tetra- and Hexanuclear Copper(I) Iminothiolate Complexes: Synthesis, Structures, and Solid-State Thermochromic Dual Emission in Visible and near-Infrared Regions. *Chem. Pap.*



2020, 74, 3717–3725.

(18) Zhang, L. L.-M.; Zhou, G.; Zhou, G.; Lee, H.-K.; Zhao, N.; Prezhdo, O. V.; Mak, T. C. W. Core-Dependent Properties of Copper Nanoclusters: Valence-Pure Nanoclusters as NIR TADF Emitters and Mixed-Valence Ones as Semiconductors. *Chem. Sci.* **2019**, *10*, 10122–10128.

(19) Taylor, W. V.; Cammack, C. X.; Shubert, S. A.; Rose, M. J. Thermoluminescent Antimony-Supported Copper-Iodo Cuboids: Approaching NIR Emission via High Crystallographic Symmetry. *Inorg. Chem.* **2019**, *58*, 16330–16345.

(20) Anumula, R.; Reber, A. C.; An, P.; Cui, C.; Guo, M.; Wu, H.; Luo, Z.; Khanna, Shiv. N. Ligand Accommodation Causes the Anti-Centrosymmetric Structure of Au<sub>13</sub>Cu<sub>4</sub> Clusters with near-Infrared Emission. *Nanoscale* **2020**, *12*, 14801–14807.

(21) Fan, X.; Yuan, F.; Wang, J.; Cheng, Z.; Xiang, S.; Yang, H.; Zhang, Z. Structural Isomerization in Cu(I) Clusters: Tracing the Cu Thermal Migration Paths and Unveiling the Structure-Dependent Photoluminescence. *CCS Chem* **2023**, *5*, 350–360.

(22) Jia, T.; Guan, Z.-J.; Zhang, C.; Zhu, X.-Z.; Chen, Y.-X.; Zhang, Q.; Yang, Y.; Sun, D. An Eight-Electron Superatomic Cu<sub>31</sub> Nanocluster with Chiral Kernel and NIR-II Emission. *J. Am. Chem. Soc.* **2023**, *145*, 47–52.

(23) Zhuo, H.; Su, H.; Cao, Z.; Liu, W.; Wang, S.; Feng, L.; Zhuang, G.; Lin, S.; Kurmoo, M.; Tung, C.; Sun, D.; Zheng, L. High-Nuclear Organometallic Copper(I)–Alkynide Clusters: Thermochromic Near-Infrared Luminescence and Solution Stability. *Chemistry A European J* **2016**, *22*, 17619–17626.

(24) Khatun, E.; Ghosh, A.; Chakraborty, P.; Singh, P.; Bodiuzzaman, M.; Ganesan, P.; Natarajan, G.; Ghosh, J.; Pal, S. K.; Pradeep, T. A Thirty-Fold Photoluminescence Enhancement Induced by Secondary Ligands in Monolayer Protected Silver Clusters. *Nanoscale* **2018**, *10*, 20033–20042.

(25) Narouz, M. R.; Takano, S.; Lummis, P. A.; Levchenko, T. I.; Nazemi, A.; Kaappa, S.; Malola, S.; Yousefalizadeh, G.; Calhoun, L. A.; Stampelcoskie, K. G.; Häkkinen, H.; Tsukuda, T.; Crudden, C. M. Robust, Highly Luminescent Au<sub>13</sub> Superatoms Protected by N-Heterocyclic Carbenes. *J. Am. Chem. Soc.* **2019**, *141*, 14997–15002.

- (26) Zhang, M.-M.; Dong, X.-Y.; Wang, Z.-Y.; Luo, X.-M.; Huang, J.-H.; Zang, S.-Q.; Mak, T. C. W. Alkynyl-Stabilized Superatomic Silver Clusters Showing Circularly Polarized Luminescence. *J. Am. Chem. Soc.* **2021**, *143*, 6048–6053.
- (27) Wei, X.; Chu, K.; Adsetts, J. R.; Li, H.; Kang, X.; Ding, Z.; Zhu, M. Nanocluster Transformation Induced by  $\text{SbF}_6^-$  Anions toward Boosting Photochemical Activities. *J. Am. Chem. Soc.* **2022**, *144*, 20421–20433.
- (28) Li, Q.; Zhou, M.; So, W. Y.; Huang, J.; Li, M.; Kauffman, D. R.; Cotlet, M.; Higaki, T.; Peteanu, L. A.; Shao, Z.; Jin, R. A Mono-Cuboctahedral Series of Gold Nanoclusters: Photoluminescence Origin, Large Enhancement, Wide Tunability, and Structure–Property Correlation. *J. Am. Chem. Soc.* **2019**, *141*, 5314–5325.
- (29) Ishii, W.; Okayasu, Y.; Kobayashi, Y.; Tanaka, R.; Katao, S.; Nishikawa, Y.; Kawai, T.; Nakashima, T. Excited State Engineering in  $\text{Ag}_{29}$  Nanocluster through Peripheral Modification with Silver(I) Complexes for Bright Near-Infrared Photoluminescence. *J. Am. Chem. Soc.* **2023**, *145*, 11236–11244.
- (30) Zhou, S.; Gustavsson, L.; Beaune, G.; Chandra, S.; Niskanen, J.; Ruokolainen, J.; Timonen, J. V. I.; Ikkala, O.; Peng, B.; Ras, R. H. A. pH-Responsive Near-Infrared Emitting Gold Nanoclusters. *Angew. Chem. Int. Ed.* **2023**, *62*, e202312679.
- (31) Si, W.-D.; Zhang, C.; Zhou, M.; Tian, W.-D.; Wang, Z.; Hu, Q.; Song, K.-P.; Feng, L.; Huang, X.-Q.; Gao, Z.-Y.; Tung, C.-H.; Sun, D. Two Triplet Emitting States in One Emitter: Near-Infrared Dual-Phosphorescent  $\text{Au}_{20}$  Nanocluster. *Sci. Adv.* **2023**, *9*: eadg3587.
- (32) Luo, L.; Liu, Z.; Du, X.; Jin, R. Near-Infrared Dual Emission from the  $\text{Au}_{42}(\text{SR})_{32}$  Nanocluster and Tailoring of Intersystem Crossing. *J. Am. Chem. Soc.* **2022**, *144*, 19243–19247.
- (33) Wan, X.; Xu, W. W.; Yuan, S.; Gao, Y.; Zeng, X.; Wang, Q. A Near-Infrared-Emissive Alkynyl-Protected  $\text{Au}_{24}$  Nanocluster. *Angew. Chem. Int. Ed.* **2015**, *54*, 9683–9686.
- (34) Li, Q.; Zeman, C. J.; Ma, Z.; Schatz, G. C.; Gu, X. W. Bright NIR-II Photoluminescence in Rod-Shaped Icosahedral Gold Nanoclusters. *Small* **2021**, *17*, 2007992.

(35) Wang, Y.; Liu, Z.; Mazumder, A.; Gianopoulos, C. G.; Kirschbaum, K.; Peteanu, L. A.; Jin, R. Tailoring Carbon Tails of Ligands on Au<sub>52</sub>(SR)<sub>32</sub> Nanoclusters Enhances the Near-Infrared Photoluminescence Quantum Yield from 3.8 to 18.3%. *J. Am. Chem. Soc.* **2023**, *145*, 26328–26338.
